# Supplementary material for: Controlled-Release from High-Loaded Reservoir-Type Systems—A Case Study of Ethylene-Vinyl Acetate and Progesterone
Source: MDPI journal article supplement (doi:10.3390/pharmaceutics12020103), 2020-01-28
Supplement: s1 [file s1]

# Supplementary Materials: Controlled-Release from High-Loaded Reservoir-Type Systems – A Case Study of Ethylene-Vinyl Acetate and Progesterone

Ioannis Koutsamanis, Amrit Paudel, Klaus Nickisch, Karin Eggenreich, Eva Roblegg and Simone Eder

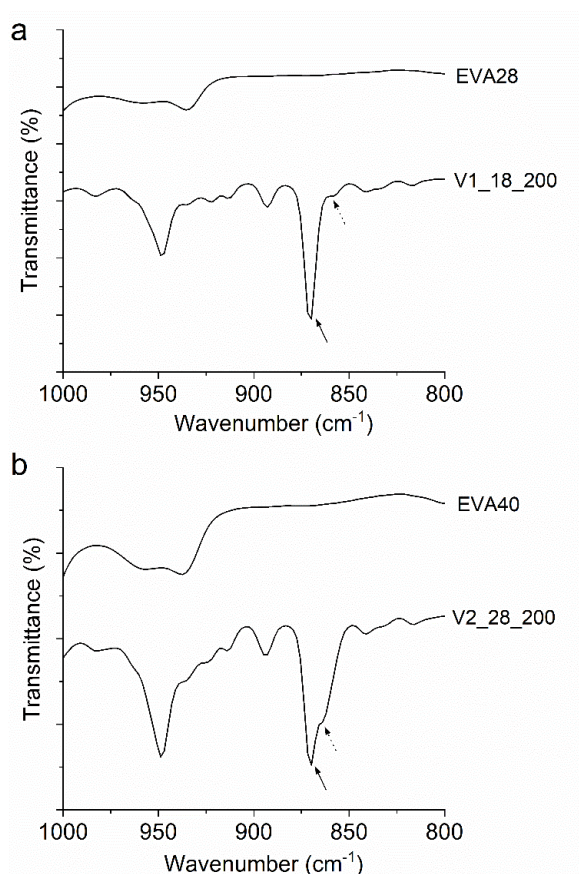

**Figure S1.** Attenuated total reflectance Fourier transform infrared spectroscopy (FTIR) spectra of (a) EVA28/progesterone (P4) systems and (b) EVA40/P4 systems. The solid arrows indicate the peaks corresponding to form I of P4 ( $870\text{ cm}^{-1}$ ). The dotted arrows indicate the peaks corresponding to form II of P4 ( $864\text{ cm}^{-1}$ ).

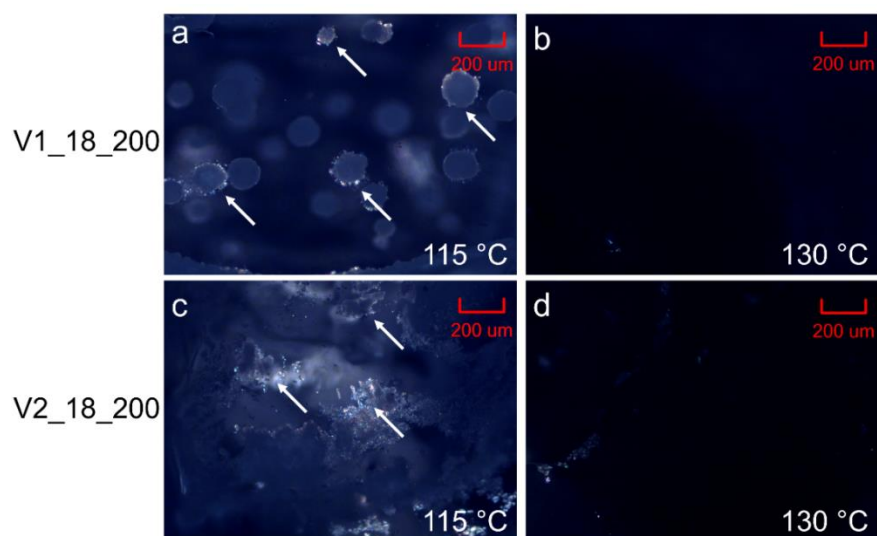

**Figure S2.** Hot-stage polarized light microscopy (HS-PLM) images of (a) V1\_18\_200 recorded at 115 °C; (b) V1\_18\_200 recorded at 130 °C, (c) V2\_18\_200 recorded at 115 °C and (d) V2\_18\_200 recorded at 130 °C. The white arrows indicate progesterone crystals.
